# Supplementary material for: Repeated Small Perturbation Approach Reveals Transcriptomic Steady States
Source: PubMed Central journal article supplement (PMC3240659; doi:10.1371/journal.pone.0029241), 2011-12-15
Supplement: pone.0029241.s001.pdf [file pone.0029241.s001.pdf]

## Text S1 Statistical model of microarray loop design

Consider a two-color microarray experiment in which  $v$  samples (designated as “varieties” by some authors and called “target” in the context of hybridization) are compared using  $s$  slides. Each spot on a slide corresponds to a particular gene. We analyzed the data for each gene separately. With each spot on the slide in which samples  $k$  (labeled with Cy5) and  $k'$  (labeled with Cy3) are mixed and hybridized, there are two associated quantities,  $R$  and  $G$ , which are the normalization-corrected intensities of red (Cy5) and green (Cy3) dyes, respectively. We assume that the intensities are proportional to the true expression levels, denoted by  $\mu_{kj}$  and  $\mu_{k'j}$  for samples  $k$  and  $k'$ , respectively, of the corresponding gene  $j$ . Since the data will be analyzed for each gene separately, for simplicity, we drop the suffix  $j$  in the following discussion and model  $R$  and  $G$  as follows:

$$R = r\mu_k 2^{\varepsilon^{(R)}}, \quad G = g\mu_{k'} 2^{\varepsilon^{(G)}}$$

where  $r$  and  $g$  are the proportional factors of red and green dyes, respectively.  $\varepsilon^{(R)}$  and  $\varepsilon^{(G)}$  are random error terms. The logarithmic ratio is

$$\begin{aligned} Y &\equiv \log_2 \left( \frac{R}{G} \right) = \log_2 (r/g) + \log_2 \left( \frac{\mu_k}{\mu_{k'}} \right) + (\varepsilon^{(R)} - \varepsilon^{(G)}) \\ &\equiv \gamma + \log_2 \left( \frac{\mu_k}{\mu_{k'}} \right) + \varepsilon \end{aligned}$$

where the parameter  $\gamma \equiv \log_2 (r/g)$  represents the relative labelling efficiency between dyes. Let  $\bar{\mu} = (\mu_1 \mu_2 \cdots \mu_v)^{\frac{1}{v}}$  be the geometric average of the true expression levels  $\mu_1, \mu_2, \dots, \mu_v$  of the  $v$  samples, then

$$Y = \gamma + \log_2 \left( \frac{\mu_k}{\bar{\mu}} \right) - \log_2 \left( \frac{\mu_{k'}}{\bar{\mu}} \right) + \varepsilon \equiv \gamma + \lambda_k - \lambda_{k'} + \varepsilon$$

where parameters  $\lambda_k \equiv \log_2 \left( \frac{\mu_k}{\mu} \right)$ ,  $k = 1, 2, \dots, v$ , represent the relative expression levels among  $v$  samples. It is easy to see that  $\sum_{k=1}^v \lambda_k = 0$ . Among them, there are only  $v-1$  independent parameters  $\lambda_1, \lambda_2, \dots, \lambda_{v-1}$  and  $\lambda_v = -(\lambda_1 + \lambda_2 + \dots + \lambda_{v-1})$ .

For each gene, let  $\underline{Y} = (Y_1, \dots, Y_n)^t$  denote the vector of the  $n$  normalization-corrected log-ratios obtained from all of the corresponding spots on slides in the experiment. In this experiment,  $n$  depends on gene and ranges between 16 to 64. The ordered set of the independent parameters is given by the parameter vector  $\underline{\beta} = (\lambda_1, \dots, \lambda_{v-1}, \gamma)^t$ .

Therefore, the data can be expressed as a linear model

$$\underline{Y} = X\underline{\beta} + \underline{\varepsilon}, \quad \underline{\varepsilon} \sim N(0, \sigma^2 I)$$

where  $\underline{\varepsilon} = (\varepsilon_1, \varepsilon_2, \dots, \varepsilon_n)^t$  is the vector of independent errors,  $I$  is the  $n \times n$  identity matrix, and  $X = (\underline{x}_1, \underline{x}_2, \dots, \underline{x}_n)^t$  is the  $n \times v$  design matrix describing how the samples are paired onto slides. Each row of  $X$  corresponds to a spot. For instance, to a spot on the slide in which samples  $k$  ( $\neq v$ , labelled with Cy5) and  $k'$  ( $\neq v$ , labelled with Cy3) are mixed and hybridized, the corresponding row is

$$\underline{x}^t = (0, \dots, 0, \overset{k\text{-th}}{1}, 0, \dots, 0, \overset{k'\text{-th}}{-1}, 0, \dots, 0, 1).$$

$\underbrace{\hspace{15em}}_{v-1}$

To a spot on the slide in which sample  $k$  ( $\neq v$ , labelled with Cy5/ Cy3) and sample  $v$  (labelled with Cy3/ Cy5) are mixed and hybridized, the corresponding row is of the following form:

$$\begin{cases} \underline{x}^t = (1, \dots, 1, \overbrace{2}^{k\text{-th}}, 1, \dots, 1, 1), & \text{if sample } k \text{ is labelled with Cy5,} \\ \underline{x}^t = (-1, \dots, -1, \overbrace{-2}^{k\text{-th}}, -1, \dots, -1, 1), & \text{if sample } k \text{ is labelled with Cy3.} \end{cases}$$

For the experiment shown in **Figure 1B**, the design matrix  $X$  is

$$\begin{bmatrix} 1 & -1 & 0 & 0 & 0 & 0 & 0 & 0 & 0 & 0 & 0 & 1 \\ 0 & 1 & -1 & 0 & 0 & 0 & 0 & 0 & 0 & 0 & 0 & 1 \\ 0 & 0 & 1 & -1 & 0 & 0 & 0 & 0 & 0 & 0 & 0 & 1 \\ 0 & 0 & 0 & 1 & -1 & 0 & 0 & 0 & 0 & 0 & 0 & 1 \\ 0 & 0 & 0 & 0 & 1 & -1 & 0 & 0 & 0 & 0 & 0 & 1 \\ -1 & 0 & 0 & 0 & 0 & 1 & 0 & 0 & 0 & 0 & 0 & 1 \\ 0 & -1 & 0 & 0 & 1 & 0 & 0 & 0 & 0 & 0 & 0 & 1 \\ 0 & 0 & 1 & 0 & 0 & -1 & 0 & 0 & 0 & 0 & 0 & 1 \\ -1 & 0 & 0 & 0 & 0 & 0 & 1 & 0 & 0 & 0 & 0 & 1 \\ 0 & -1 & 0 & 0 & 0 & 0 & 0 & 1 & 0 & 0 & 0 & 1 \\ 0 & 0 & -1 & 0 & 0 & 0 & 0 & 0 & 1 & 0 & 0 & 1 \\ 0 & 0 & 0 & -1 & 0 & 0 & 0 & 0 & 0 & 1 & 0 & 1 \\ 0 & 0 & 0 & 0 & -1 & 0 & 0 & 0 & 0 & 0 & 1 & 1 \\ -1 & -1 & -1 & -1 & -1 & -2 & -1 & -1 & -1 & -1 & -1 & 1 \\ 1 & 1 & 1 & 1 & 1 & 2 & 1 & 1 & 1 & 1 & 1 & 1 \\ 0 & 0 & -1 & 0 & 0 & 0 & 0 & 0 & 1 & 0 & 0 & 1 \end{bmatrix}.$$

Here we assume a situation in which there is a single replicate for each gene on each slide. If the number of replicates for each gene is greater than one, the corresponding row should be repeated accordingly.

The vector  $\underline{\beta}$  of unknown parameters can be estimated by the least square estimator  $\hat{\underline{\beta}}$ ,  $\hat{\underline{\beta}} = (X^t X)^{-1} X^t Y$ . The expression profiles presented in this study are

$$x_1 = \hat{\lambda}_1 - \hat{\lambda}_7, \quad x_2 = \hat{\lambda}_2 - \hat{\lambda}_8, \quad x_3 = \hat{\lambda}_3 - \hat{\lambda}_9, \quad x_4 = \hat{\lambda}_4 - \hat{\lambda}_{10}, \quad x_5 = \hat{\lambda}_5 - \hat{\lambda}_{11}, \quad \text{and} \quad x_6 = \hat{\lambda}_6 - \hat{\lambda}_{12}.$$

### Criterion to eliminate low variant genes (0.21):

To tease out gene having characteristic steady-state expression patterns, we filtered out all the genes with low variation avoiding the insignificant random noise. We used top 10 % variant genes as the candidates for further model fitting algorithm and the cutting value located at 0.21. (Text S1 Figure 1)

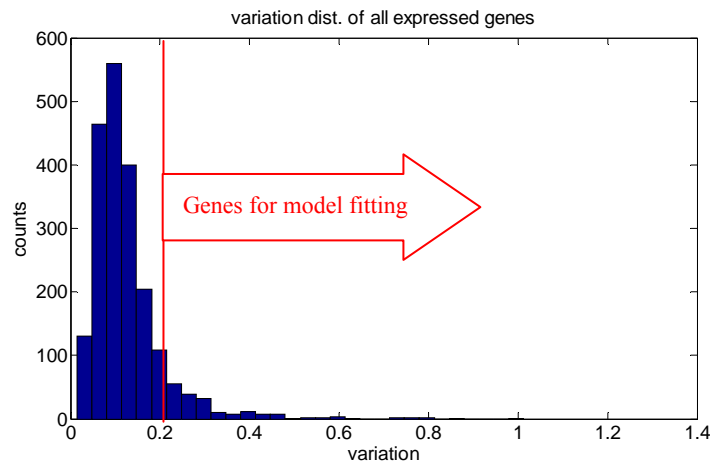

**Text S1 Figure 1. The histogram of variation of each gene over 6 time periods. The cutting vale, 0.21 was set to filter out genes with low variation.**

### Criterion of significantly correlated to fitting model (0.75):

The null hypothesis of gene expression was set as  $X = N(0,1)$ . The distribution of correlation coefficient to the model (equation 2 in the main text) was shown as Text S1 Figure 2 (red line).

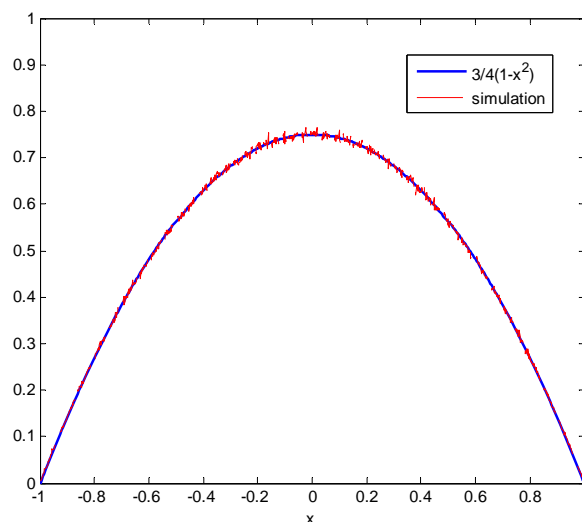

**Text S1 Figure 2. The one-million-times simulation of the null hypothesis was shown as red line. Meanwhile, a PDF was shown in blue to describe the distribution of this simulation to gain the power of analytical results.**

A density function,  $f(x) = \frac{3}{4}(1 - x^2)$  was used to describe this distribution as shown in Text S1 Figure 2 (blue line).

Consequently,  $p$ -value( $p$ ) was determined by equation  $p = \frac{1}{4}c^3 - \frac{3}{4}c + \frac{1}{2}$ , where  $c$  is the cutting value(criterion). Regarding this work, the criterion we used to determine significantly correlated to fitting model, 0.75, corresponds to a  $p$ -value, 0.043.

The designate  $p$ -value was strongly case dependent. The strength of perturbation, the susceptibility of the reacting biosystems (transcriptomics in this paper), and the noise level all affect the suitable  $p$ -value. With this model, one can easily determine the cutting value and its corresponding  $p$ -value.
